1 **Competitive binding of independent extension and retraction motors explains**  
2 **the quantitative dynamics of type IV pili**

3 Matthias D. Koch<sup>1,2</sup>, Chenyi Fei<sup>1,2</sup>, Ned S. Wingreen<sup>1,2</sup>, Joshua W. Shaevitz<sup>1,3,\*</sup>, Zemer Gitai<sup>2,\*</sup>

4

5 <sup>1</sup> Lewis-Sigler Institute for Integrative Genomics, Princeton University

6 <sup>2</sup> Department of Molecular Biology, Princeton University

7 <sup>3</sup> Joseph Henry Laboratories of Physics, Princeton University

8 \* Corresponding authors: [zgitai@princeton.edu](mailto:zgitai@princeton.edu), [shaevitz@princeton.edu](mailto:shaevitz@princeton.edu)

9

## 10 **Abstract**

11           The functions of type IV pili (TFP) are mediated by cycles of extension and retraction. The  
12 coordination of these cycles remains mysterious due to poor quantification of TFP dynamics. Here we  
13 fluorescently label the TFP in the opportunistic pathogen *Pseudomonas aeruginosa* and track the full  
14 extension and retraction cycles of individual TFP to quantify their dynamics. We test several models for  
15 the switch between extension and retraction using quantitative experiments, biophysical modeling and  
16 genetics. We invalidate the prominent hypothesis that this switch is triggered by surface contact. Instead,  
17 we show that the entire repetitive cycle of extension and retraction of individual TFP is governed by the  
18 stochastic binding of antagonistic extension and retraction motors and explain how this mechanism  
19 quantitatively defines physiologically-important features like TFP length and their production rate.  
20 Interestingly, our results suggest that the major throttle of TFP production is the unbinding of the  
21 retraction motor.

## 23 **Introduction**

24           Type IV pili (TFP) are amazing molecular machines that extend and retract extracellular  
25 polymers used for many biological functions<sup>1-3</sup>. TFP have emerged to be of particular interest in the  
26 opportunistic human pathogen *Pseudomonas aeruginosa*, as they promote surface motility, colonization,  
27 biofilm formation, and surface sensing<sup>4-11</sup>. In *P. aeruginosa*, the semi-flexible polymers of TFP are based  
28 on the major pilin (PilA) subunits whose extension is mediated by the PilB molecular motor and whose  
29 retraction is mediated by the PilT motor<sup>2,3</sup>. The structures of TFP and the components that build them  
30 have been well characterized by static methods such as electron microscopy<sup>12</sup>. However, the behaviors  
31 mediated by TFP rely on their dynamics and no quantitative model has been proposed to date to explain  
32 how cycles of extension and retraction are controlled. For example, even after decades of research by  
33 many groups, fundamental questions like whether there is a molecular ruler that sets TFP length or  
34 whether pilus extension/retraction are triggered or stochastic have remained unanswered.

35           The major hurdles to describing TFP dynamics are the limitations of current approaches for  
36 visualizing pili. For example, TFP were first imaged by electron microscopy, but this method can only be  
37 performed on fixed or frozen cells such that dynamics are lost<sup>13-15</sup>. Optical tweezers, atomic force  
38 microscopy, micropillar assay and traction force microscopy are techniques to measure pilus retraction  
39 forces and also yield information about retraction dynamics, but in an indirect way and only for pilus  
40 retraction<sup>4,16-21</sup>. A recent study used interferometric imaging to directly image pili in living cells, but this  
41 technique generates a strong halo around the cell that overshadows any pili that are shorter than ~3

42 microns<sup>22</sup>. Despite the limitations of these approaches, they have led to several competing models for  
43 how the switch between TFP extension and retraction is controlled. A cryo-EM study did not observe  
44 motors at the base of unpiliated structures, suggesting that the motors do not remain bound after TFP  
45 retraction<sup>12</sup>. Meanwhile, an interferometry study focusing on the longest subpopulation of TFP suggested  
46 that TFP retraction is triggered by surface association<sup>22</sup>. However, the inability to directly visualize the  
47 dynamics of the entire TFP population previously limited the ability to directly test these models.

48 Here we addressed the above limitations by directly fluorescently labeling the TFP of *P.*  
49 *aeruginosa*. Fluorescent labeling of TFP was first achieved with non-specific labeling of extracellular  
50 proteins<sup>23</sup>. However, similar to the interferometry approach, this surface labeling approach led to a strong  
51 halo from staining of the cell body that prevented analysis of short pili. More recently, TFP from  
52 *Caulobacter crescentus* and *Vibrio cholerae* were directly labeled by introducing a reactive cysteine  
53 residue into the pilin sequence<sup>24-26</sup>. Here we apply this approach to *P. aeruginosa* and use it to perform  
54 the first direct quantitative analysis of full TFP extension and retraction cycles of individual pili. We go  
55 on to develop and test quantitative models for the behaviors we observe. We show that TFP production  
56 rate, length, and dynamics can be fully explained by the mutually exclusive stochastic binding of the  
57 extension and retraction motors, and that this stochasticity persists in the presence or absence of surface  
58 association.

59

## 60 **Results**

### 61 ***Quantifying TFP dynamics reveals that P. aeruginosa makes mostly short pili that are highly dynamic***

62 We fluorescently labeled the major protein of the *P. aeruginosa* pilus fiber (PilA) by introducing  
63 a cysteine point mutation, A86C, that we then labeled with the thiol-reactive maleimide dye Alexa488-  
64 mal (Supplementary Figure 1)<sup>24</sup>. To check that this mutation does not disrupt TFP function, we analyzed  
65 twitching motility. Using a standard stab agar twitch assay, we show the PilA-A86C mutant twitches at  
66 levels close to wild type on the population level (Supplementary Figure 1). We then looked at individual  
67 cells confined between a 0.5% agarose pad and the cover slip and found that cells in this condition twitch  
68 actively (Supplementary Movie 1), indicating that the PilA-A86C mutation is functional. We used this  
69 configuration for all our experiments unless stated otherwise.

70 The fluorescent labeling strategy resulted in bright images of dynamic pili with high contrast  
71 (Fig. 1a,b and Supplementary Movie 2). Having established that we can label TFP without disrupting  
72 their function, we first counted the number of pili that individual cells make in a single snapshot and

73 confirmed previous reports that used electron microscopy to show that only a minority of cells (<25%)  
74 are piliated at any given time<sup>15,27</sup>. However, when we then imaged single cells for a period of ~30  
75 seconds, we found that >80% of cells form at least one pilus (Fig. 1c). We quantified the rate of pilus  
76 production,  $R_p$ , in individual cells and found a very broad distribution between 0 and 35 pili per minute,  
77 with a characteristic rate for a typical cell of 8 min<sup>-1</sup> (Fig. 1d). Whereas static imaging suggested that pili  
78 are only made by a small subpopulation of *P. aeruginosa* cells<sup>15,27</sup>, our dynamic imaging suggests that  
79 nearly all *P. aeruginosa* cells make short-lived highly-dynamic pili.

80 To further quantify TFP behavior we measured the distribution of pilus lengths (Fig. 1e). We  
81 found that the pilus length ( $L_p$ ) also exhibits a wide distribution between 0.3  $\mu\text{m}$  (limited to optical  
82 resolution) and 8  $\mu\text{m}$ , with a characteristic length for a typical pilus of 0.8  $\mu\text{m}$ . We note that this result  
83 differs from the only other quantitative study of *Pseudomonas* pilus lengths which observed only pili  
84 longer than 3  $\mu\text{m}$ <sup>22</sup>. However, the interferometric imaging technique used in that study could not detect  
85 pili shorter than the halo produced by the cell itself (2 – 3  $\mu\text{m}$ ). Our direct labeling approach supports the  
86 hypothesis that most *P. aeruginosa* extend short, short-lived pili.

87

### 88 ***TFP extension and retraction events can be discontinuous***

89 The ability to directly label pili enabled us to analyze the extension and retraction dynamics of  
90 individual pili. A typical pilus had a median extension speed of  $v_{ext} = 500$  nm/s and a median retraction  
91 speed  $v_{ret} = 750$  nm/s (Fig. 1f). These rates are in agreement with a previous study that measured  
92 extension and retraction velocities in *P. aeruginosa*<sup>23</sup>, further validating that our measurements reflect the  
93 physiologically-relevant behaviors of *P. aeruginosa* TFP.

94 An analysis of the durations of extension and retraction proved more surprising. We analyzed the  
95 entire extension-retraction cycle by tracing the tips of pili relative to the cell body over time and defining  
96 periods of extension, dwelling, and retraction (see Methods and Supplementary Figure 2). A typical pilus  
97 extends for about  $T_{ext} = 2$  seconds, then dwells for less than  $T_d = 1$  second, and finally retracts all the way  
98 back (Fig. 1g and Supplementary Movie 3). We also observed unexpected patterns of extension and  
99 retraction. In 15 out of 196 dwell events, an extension event was followed by another extension (Fig. 1h  
100 and Supplementary Movie 4). Similarly, in 11 out of 127 retraction events, the pilus stalled during the  
101 retraction, resulting in another dwell event, followed by continued retraction as shown in Fig. 1i and  
102 Supplementary Movie 5. Such intermittent dwell events resulting in discontinuous extension and  
103 retraction represent a previously unappreciated feature that must be explained by any model of pilus  
104 dynamics.

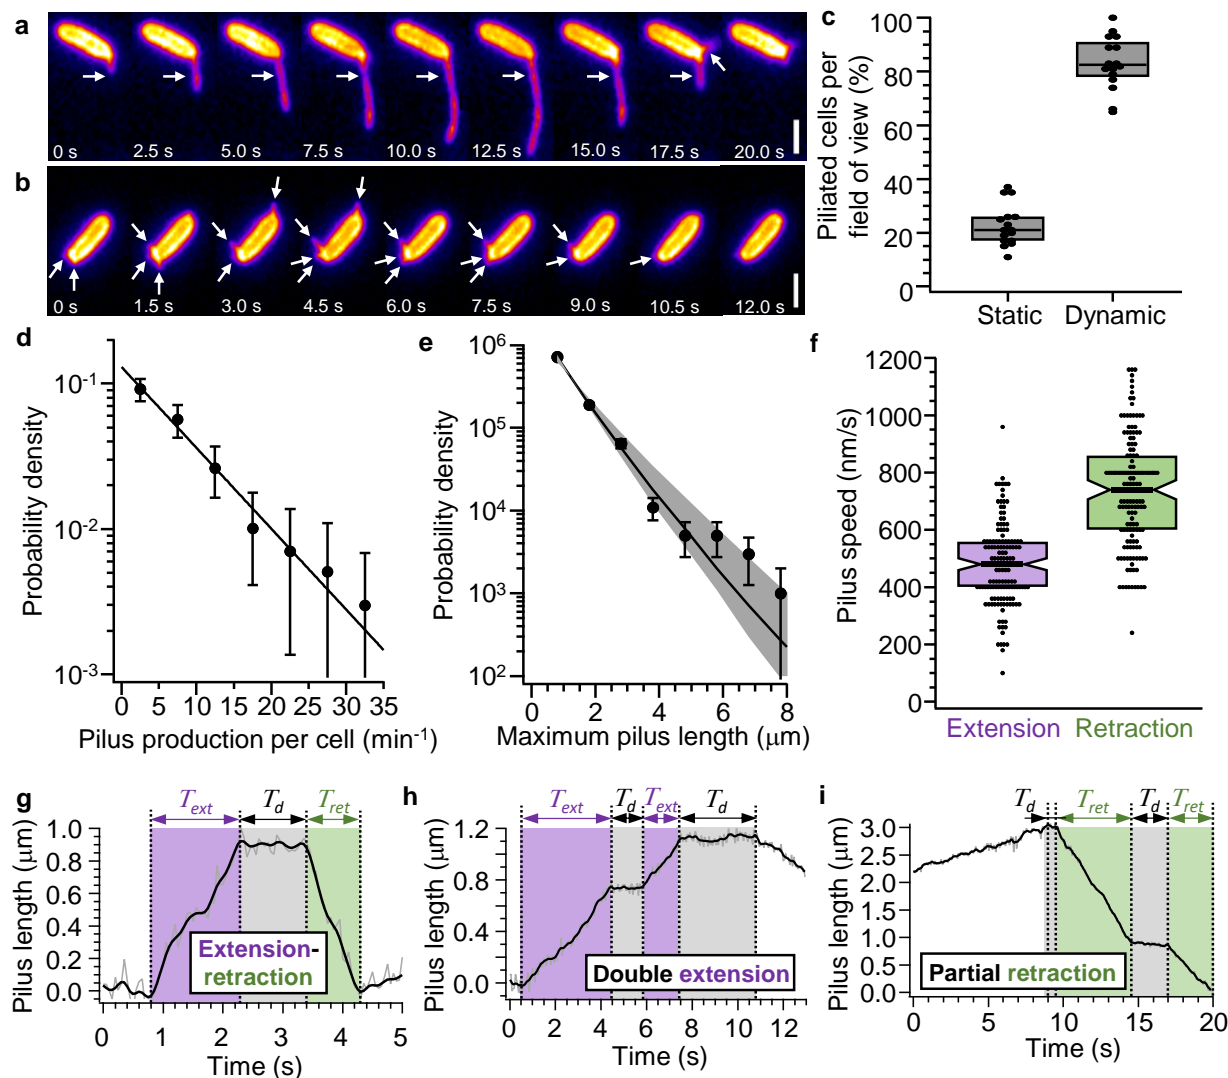

**Fig. 1 | Quantitative measurement of pilus dynamics using Alexa488 coupled to thiol-reactive maleimide and the Pila<sup>A86C</sup> Cysteine knock-in mutant on an agarose pad. a**, Movie frames showing the extension and retraction of a long pilus (white arrow,  $L_p = 5 \mu\text{m}$ ). Scale bar  $2 \mu\text{m}$ . **b**, Movie frames showing the typical extension and retraction of several short pili (white arrows,  $L_p \leq 1 \mu\text{m}$ ). Scale bar  $2 \mu\text{m}$ . **c**, Comparison of fraction of cells in a single image with at least one pilus when analyzed in just a single frame (static) or a movie (dynamic) of 30 seconds in length. **d**, Distribution of pilus production rate per cell. Error bars are 95% confidence intervals obtained by bootstrapping. **e**, Distribution of maximum extension lengths of individual pili. Error bars are 95% confidence intervals obtained by bootstrapping. Gray shaded area: 95% confidence interval from model simulation for comparison (MCS, see below and Methods). **f**, Pilus extension and retraction speed. Notched boxes represent the median and 25% / 75% quantiles. **g**, Time trace of pilus length for a typical pilus extension/retraction event: extension time  $T_{ext}$ , dwell time  $T_d$ , retraction time  $T_{ret}$ . **h**, Time trace of pilus length for a double extension event. **i**, Time trace of pilus length for a discontinuous retraction event. **g,h,i** Also see Supplementary Figure 2 and Supplementary Movies 3,4,5. (See Supplementary Table 4 for sample sizes and number of replicates).

105

106

107

108

109

110

111

112

113

114

115

116

117

118

119

120

121

122

123

124 ***TFP extension and retraction dynamics are unaffected by the presence of a surface***

125 To understand the mechanisms that control pilus dynamics and the biophysical basis for our  
126 surprising findings we next sought to understand how the switch between TFP extension and retraction is  
127 coordinated. A prominent hypothesis is that TFP retraction is triggered by mechanical contact of the pilus  
128 tip with a surface<sup>12,22</sup>. To test this model, we compared the TFP dynamics of cells in two different  
129 conditions: cells confined between agarose and a coverslip (surface-associated), and cells prevented from  
130 contacting a surface by holding them 5  $\mu\text{m}$  above the cover slip using an optical trap (liquid-trapped)  
131 (Fig. 2a). In addition to holding the bacteria away from the surface, the line-scanning optical trap<sup>28</sup>  
132 orients the cells with the microscope focal plane, which allowed us to observe pilus dynamics on both cell  
133 poles.

134 As show in Supplementary Movie 6 and 7, individual cells with labeled pili confined between  
135 0.5% agarose and the coverslip can twitch, which means that their TFP are in mechanical contact with the  
136 environment. Similarly, we observed frequent TFP extension and retraction for liquid-trapped cells (Fig.  
137 2b,c and Supplementary Movies 8-10), indicating that loss of surface contact does not completely abolish  
138 pilus retraction. If the surface-triggered model is true, the dynamics of TFP for cells with and without  
139 surface contact should be quantitatively different. For example, if mechanical contact of the pilus tip with  
140 a surface triggers pilus retraction, then we expect to see fewer retracting TFP for liquid-trapped cells  
141 compared to surface-associated cells. Surprisingly, the fractions of retracting pili are 95% for liquid-  
142 trapped cells and 93% for surface-associated cells and are therefore indistinguishable (Fig. 2d). It is  
143 possible that we did not observe a difference in the fraction of retracting pili because surface-association  
144 accelerates the timing between extension and retraction, in which case TFP would retract eventually even  
145 without a mechanical trigger signal. To test this hypothesis, we quantified the time each TFP dwells  
146 between when the extension comes to a halt and the retraction starts. If the contact with a surface  
147 stimulates pilus retraction the distribution of dwells times should be shorter for surface-associated cells.  
148 However, the distributions of dwell times for both conditions were indistinguishable from each other (Fig.  
149 2e). Similarly, the distributions of TFP length were indistinguishable in both conditions (Fig. 2f),  
150 indicating that surface contact also does not stop TFP extension. We therefore conclude that the dynamics  
151 of the switch between pilus extension and retraction are indistinguishable whether or not a surface is  
152 present.

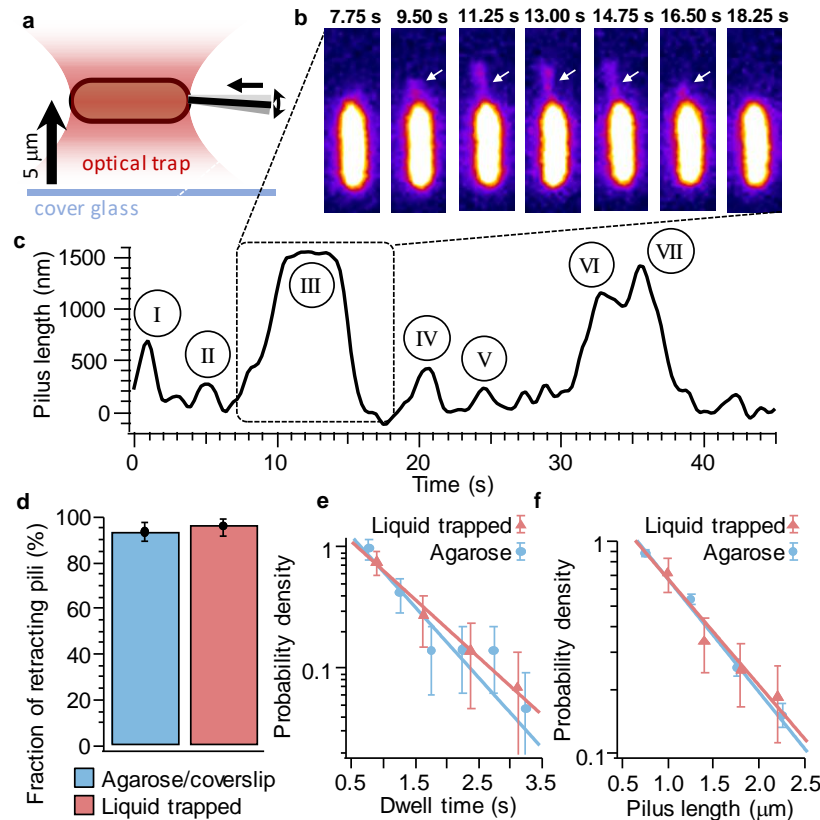

**Fig. 2 | Pilus retraction does not require mechanical stimulation.** **A**, Schematic of surface contact-free (“liquid-trapped”) assay: single cells are held about 5 μm above the surface and aligned with the focal plane by line-scanning optical tweezers. **b**, Image sequence of an individual pilus extending and retracting without surface contact (also see Supplementary Movie 10). **c**, Time trace of pilus length for seven individual pili (roman numerals) extending and retracting from the same pole of the same cell without surface contact. **d**, Fraction of retracting pili for cells with and without surface contact. **e**, Dwell times between stop of extension and start of retraction of individual pili for cells with and without surface contact. **f**, Maximum length of individual pili for cells with and without surface contact. (See Supplementary Table 4 for sample sizes and number of replicates).

### 165 *A stochastic model of motor binding can explain the full extension and retraction cycles of individual* 166 *TFP*

167 After the surprising result that TFP dynamic are unaffected by the presence of a surface we  
168 considered other mechanisms that could explain the switch between extension and retraction. A recent  
169 cryo-EM study suggested that only one type of motor, extension or retraction, is bound to the pilus  
170 machine at any given time<sup>12</sup>. This indicates that both motors must compete for the binding to the  
171 machine. Furthermore, the distributions of the maximum pilus length, the rate of pilus production, and the  
172 dwell time between extension and retraction are exponential in shape (Fig. 1d,e and Fig. 2e), suggesting  
173 that stochastic protein binding and unbinding might govern pilus dynamics (see Methods). We thus

174 formulated a quantitative model in which pilus extension and retraction are governed by the stochastic  
175 binding of an antagonistic extension or a retraction motor to the pilus base in a mutually exclusive  
176 manner. We note that the only assumptions of this model are that each motor has a finite probability to  
177 bind the unbound pilus machine, and that no more than one motor can be bound at a given time (Fig. 3a).

178 This stochastic model for TFP dynamics includes six independent parameters: the extension and  
179 retraction speed of the pili ( $v_{ext}$  and  $v_{ret}$ ), the binding and unbinding rates of the extension motors ( $k_{ext,on}$   
180 and  $k_{ext,off}$ ), and the binding and unbinding rates of the retraction motors ( $k_{ret,on}$  and  $k_{ret,off}$ ). The extension  
181 and retraction speeds were directly measured (Fig. 1f). In the following, we show how each of the other  
182 rates can be estimated from our data (see Fig. 3 and Methods for details). We then use our model to make  
183 quantitative predictions that we validate experimentally and show how the model makes the unexpected  
184 prediction that the main limiting factor for pilus dynamics is the unbinding of the retraction motor.

185 The duration of each pilus extension event is equal to how quickly the extension motor becomes  
186 unbound. Thus, the unbinding rate of the extension motor can be derived from the characteristic  
187 unbinding time  $\tau_{ext}$  by  $1/k_{ext,off} = \tau_{ext,off} = \tau_{ext}$ . We directly measured the distribution of pilus extension times  
188 (Fig. 3b), which had an exponential shape and a characteristic time of 1.6s ( $\tau_{ext}$ , Fig. 3b), indicating that  
189  $k_{ext,off}^{-1} = 1.6_{-0.2}^{+0.5}$  s.

190 The relationship between the unbinding rate of the retraction motor and the duration of retraction  
191 events is more complicated. For the majority of retraction events, the pilus becomes fully retracted so we  
192 cannot tell when the retraction motor becomes unbound. We do, however, observe a number of retraction  
193 events that are interrupted by a dwell period, suggesting that the retraction motor became unbound during  
194 these events. We observe such events with a probability of 11 partial retractions out of 127 total events  
195 (9%). These events represent the short-time tail of the distribution of unbinding times. To account for all  
196 retraction events, we used a maximum likelihood approach to find the characteristic time constant of  
197 unbinding that best accounts for the full distribution of both complete and partial retraction events. We  
198 note that the only assumption in this approach is that the retraction unbinding times are exponentially  
199 distributed, which is consistent with all our other pilus measurements. As detailed in the Methods and  
200 Supplementary Figure 3, this maximum likelihood approach estimated the unbinding rate of the retraction  
201 motor as  $k_{ret,off}^{-1} = 9.1_{-3.8}^{+9.7}$  s.

202 The dwell periods  $T_d$  that follow every extension event allow us to estimate the binding rates of  
203 both extension and retraction motors. The time to the next extension or retraction event is set by the  
204 binding of the next motor to that pilus, such that  $\tau_{dwell} = 1/(k_{ext,on} + k_{ret,on})$ . We measured a characteristic  
205 dwell time of  $\tau_{dwell} = 0.35_{-0.05}^{+0.25}$  s from the distribution of all dwells (Fig. 3c). The ratio of the binding rates



206 of the extension and retraction motors sets the fraction of post-dwell events that are extensions versus  
 207 retractions. As described above, post-dwell we observed 15 secondary extensions and 181 retractions,  
 208 suggesting  $k_{ext,on} / k_{ret,on} = 15 / 181$ . Combining these values and taking into account the finite  
 209 experimental time resolution that limits our ability to detect short dwell periods (see Methods and  
 210 Supplementary Figure 4), we estimate  $k_{ext,on}^{-1} = 2.4_{-0.3}^{+1.8}$  s and  $k_{ret,on}^{-1} = 0.40_{-0.05}^{+0.30}$  s.

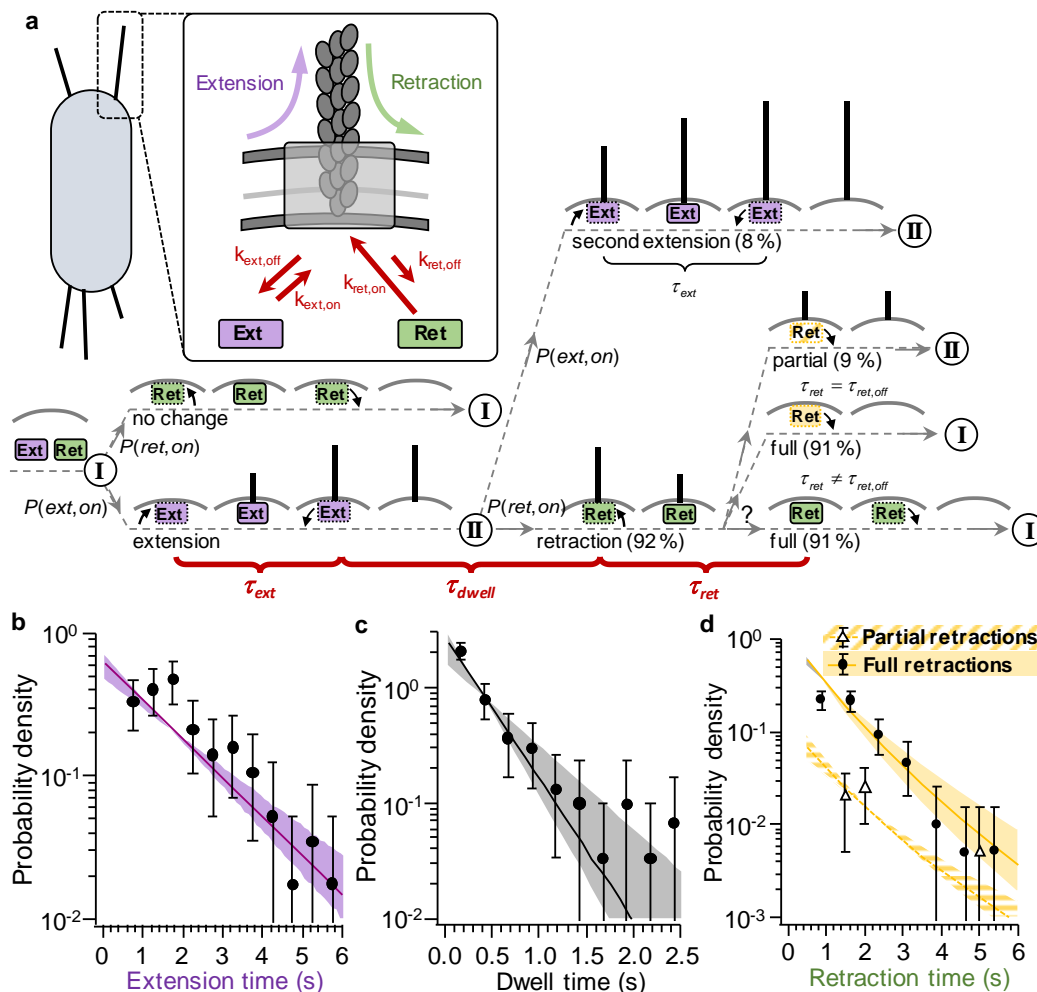

211

212 **Fig. 3 | Competitive substrate binding model predicts rare multistep extension and**  
 213 **retraction events with short intervening stalls. a,** Model schematic. The extension motor (Ext,  
 214 purple) and retraction motor (Ret, green) bind with probability  $P(Ext, on)$  and  $P(Ret, on)$ ,  
 215 respectively, un-piliated, respectively, pilated pilus machine without bound  
 216 extension or retraction motor. **b,** Histogram of extension times of individual pili. **c,** Histogram of  
 217 dwell times between stop of pilus extension and start of the subsequent pilus retraction. **d,**  
 218 Histogram of retraction times of individual pili. **b, c, d** Error bars are 95 % confidence intervals  
 219 obtained by bootstrapping. Shaded areas are 95 % confidence interval from model simulations  
 220 (MCS, see Methods). (See Supplementary Table 4 for sample sizes and number of replicates).

221 To validate our model and parameters, we sought to use the model to predict the ratio of partial to  
 222 full retractions. We simulated cycles of extension and retraction of individual pili using the Monte Carlo

223 method by drawing random samples from the model's distributions of extension and retraction times and  
224 velocities (referred to as MCS, see Methods). From those numbers, we calculated the expected length of  
225 each pilus and determined if its retraction time was enough to fully retract it, i.e., if the retraction gave  
226 rise to a partial or full retraction. We compared our simulated distribution of partial retractions (Fig. 3d,  
227 yellow dashed) and full retractions (Fig. 3d, yellow) to our experimental findings and found good  
228 agreement. As a further verification, we analyzed an independent set of data that was not used to estimate  
229 the model's parameters and found that the resulting pilus lengths agreed well with our model's simulated  
230 results (Fig. 1e).

231

232 ***The effect of a retraction motor mutant on discontinuous retractions is accurately predicted by the***  
233 ***stochastic TFP model***

234 To further support our model we used a genetic approach to test one of its predictions. The model  
235 suggested that if TFP extension and retraction speeds are independent of motor binding rates, a mutant  
236 that reduces retraction speed should show more partial retraction events because TFP need more time to  
237 complete a full retraction. To test this prediction we analyzed pilus dynamics in a point mutant (PilT-  
238 H222A) in the ATPase activity of the PilT retraction motor that affects pilus retraction speed<sup>29</sup>. We first  
239 confirmed that PilT-H222A pili retract three times slower compared to WT, while the pilus extension  
240 speed and all four binding/unbinding rates remain indistinguishable from WT (Supplementary Figure  
241 3,5). We then measured the fraction of partial retractions of PilT-H222A pili, and indeed found that they  
242 increased relative to WT (Fig. 4a). We also performed a simulation in which we reduced  $v_{ret}$  threefold but  
243 left all the other parameters unchanged and observed good agreement between this simulation and our  
244 experimental results with PilT-H222A (Fig. 4b). These results show that the discontinuous pilus retraction  
245 can be explained quantitatively by the stochastic binding and unbinding of the pilus motors.

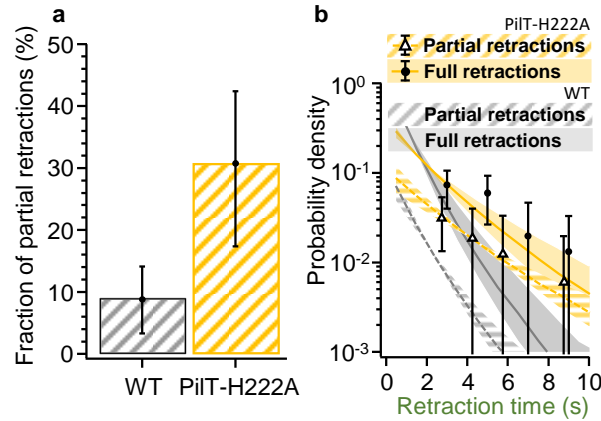

246

247

248

249

250

251

252

253

**Fig. 4 The change of the fraction of partial retractions for the slowly retracting mutant PiIT-H222A is accurately predicted by the model. a,** The fraction of partial retractions increases about threefold from WT to PiIT-H222A. **b,** Distribution of retraction times of individual pili for PiIT-H222A (yellow = model prediction, markers = experimental data) and WT (grey) for comparison. **a, b,** Error bars are 95 % confidence intervals obtained by bootstrapping. **b,** Shaded areas are 95 % confidence intervals from model simulation (MCS, see Methods). (See Supplementary Table 4 for sample sizes and number of replicates).

254

255 ***The switch between extension and retraction is governed by the stochastic binding and unbinding of***  
256 ***both motors***

257

258

259

260

261

262

263

264

265

266

267

268

269

270

271

272

We next sought to use our quantitative framework to determine how TFP switch between extension and retraction. Based on our observations and recent cryo-EM and interferometric imaging data we tested three competing models<sup>12,22</sup>: One hypothesis is that both the binding and unbinding of the retraction motor are purely stochastic and independent of the presence of the pilus itself (Model 1: The stochastic model). A second possibility is that the retraction motor can only bind to the machine if a pilus is present, but unbinds in a stochastic manner whether or not the pilus has fully retracted (Model 2: The pilus-dependent model). A third possibility is that the retraction motor both only binds if a pilus is present and unbinds as soon as the pilus is fully retracted (Model 3: The pilus-sensing model). These three models make different predictions for the TFP production rate. Due to the rapid on rate and slow dissociation rate of the retraction motor compared to the extension motor, Model 1 predicts that the pilus machine is occupied by the retraction motor most of the time. Because the extension and retraction motors compete for binding to the pilus machinery, this suggests that the rate of pilus production is primarily limited by the retraction motor. In Models 2 and 3 the retraction motor does not bind the unpiliated machine, and thus the extension motor can bind more frequently, resulting in more pilus extension events compared to Model 1. Furthermore, since the retraction motor unbinds after the pilus is fully retracted in Model 3, we would expect to see the largest number of pili in this model.

273 To differentiate between these different behaviors of the retraction motor, we again used the  
274 Monte Carlo method (see Methods) to simulate cycles of the stochastic binding and unbinding of the  
275 extension and retraction motors using each of the three models (Fig. 5a). We counted the number of pilus  
276 extension events per pilus machine in a 60 second time window in the simulation and found that for the  
277 simple stochastic model (Model 1), the pilus production rate was approximately exponentially distributed  
278 with typically one pilus event per minute (Fig. 5c). The simulations for Models 2 and 3 were distinctively  
279 different from those of Model 1 as both Models 2 and 3 displayed a more Gaussian distribution peaking  
280 between 3 pili per minute (Model 2) and 6 pili per minute (Model 3).

281 To experimentally differentiate the three hypotheses, we measured the pilus production rates of  
282 individual pilus machines and compared these results to the simulated distributions from the three models.  
283 Measuring the pilus production rate of individual machines is experimentally challenging because a pilus  
284 machine is only 15 to 20 nm in diameter and neighboring complexes can be closer together than the  
285 conventional optical resolution limit<sup>12</sup>. To tackle this problem, we used live-cell super-resolution  
286 microscopy and looked at maximum projections of entire movie stacks (Fig. 5b and Supplementary  
287 Movie 11). Due to the strong curvature at the poles, pili originating from close-by machines (roman  
288 numerals in Fig. 5b) emanate at different angles and can be more easily distinguished. We thus analyzed  
289 changes in intensity along a line just outside the cell circumference (transparent curve, Fig. 5b) in a  
290 kymograph (Supplementary Figure 6b). By assigning each pilus extension event to the machine from  
291 which it emanated, we were able to count the frequency of pilus extension events per individual machine  
292 (Supplementary Figure 6c). We found that pilus extension frequency was exponentially distributed with  
293 an average of roughly one pilus extension events per minute. Qualitatively, these data agreed well with  
294 the simple stochastic model (Model 1), but were incompatible with both Models 2 and 3 since these  
295 distribution have a different shape (Fig. 5c).

296 The only deviation between our Model 1 simulation and the experimental results is for production  
297 rates  $\geq 4$  pili  $\text{min}^{-1}$ . We suggest that this small deviation can be attributed to our finite imaging resolution.  
298 This resolution limit makes it difficult to distinguish if two short pili emanate from the same machine or  
299 from two nearby complexes, which in turn leads to a systematic overestimation of pilus extension  
300 frequency. Nevertheless, we quantitatively tested if this deviation is statistically significant and performed  
301 Kolmogorov-Smirnov tests that compare the simulations for each model using the mean  
302 binding/unbinding rates and their lower and upper bounds separately to the experimental data. Model 1  
303 has  $P < 0.05$  for the mean binding/unbinding rates,  $P < 0.001$  for the lower bound of these rates and  $P >$   
304  $0.05$  for their upper bounds. Models 2 and 3 yield  $P > 0.05$  for all combinations of the rates. This  
305 confirms the qualitative result that Model 1 can best explain the experimental data and further indicates

306 that our estimates for the binding and unbinding rates of the motors might be slightly higher than the  
307 actual binding and unbinding rates. Together, our findings support the conclusion that the switch between  
308 pilus extension and retraction is stochastic and that the rate of pilus production is limited by the slow  
309 unbinding step of the retraction motor.

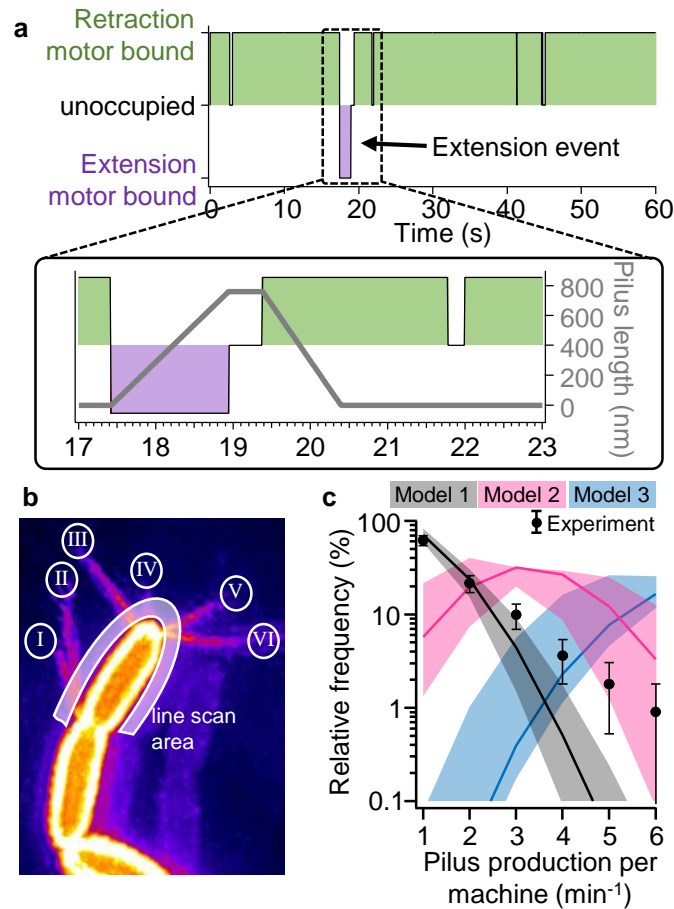

310

311 **Fig. 5 | Comparison of the pilus production rate predicted by different models for the switch**  
312 **between extension and restriction. a,** Example of Monte Carlo simulation for binding and  
313 unbinding of the extension and retraction motor showing a single pilus extension event. Note that  
314 the retraction motor stays attached after the pilus is retracted fully. **b,** Maximum projection of 60  
315 super-resolved movie frames showing directions of all pili that have been extended by the cell.  
316 Roman numerals label individual pilus machines. Thick transparent curve represents the line scan  
317 area used to analyze pilus production see (Supplementary Information). **c,** Distribution of the  
318 pilus production rate per machine. Experimental data are shown as black dots with error bars.  
319 Monte Carlo simulations are shown for the stochastic model (Model 1, grey), the pilus sensing  
320 model (Model 2, pink), and the pilus-dependent model (Model 3, blue). Error bars are 95 %  
321 confidence intervals obtained by bootstrapping. Shaded areas are 95 % confidence intervals from  
322 model simulation (MCS, see Methods) and bold lines are their means. (See Supplementary Table  
323 4 for sample sizes and number of replicates).

324

## 325 Discussion

326 Here we fluorescently labeled the TFP of *P. aeruginosa* and quantified the extension and  
327 retraction cycles of individual pili. We confirmed previous findings of pilus extension and retraction rates  
328 and the number of piliated cells at any given time. However, we also made the surprising finding that  
329 cells make many more and much shorter pili than previously appreciated. For example, while prior  
330 studies have focused on long pili ( $> 3 \mu\text{m}$ ) that can be detected by interferometry, we showed that pili are  
331 predominantly shorter than  $1 \mu\text{m}$ <sup>22,23</sup>. Further, we were able to show that pili are highly dynamic: a  
332 typical cell makes a new pilus every 5 – 10 seconds and retracts each pilus rapidly. Moreover, both  
333 extension and retraction can be discontinuous. By quantitatively comparing different models for the  
334 switch between extension and retraction we were able to show that only the stochastic binding and  
335 unbinding of extension and retraction motors is able to quantitatively explain all TFP dynamics, and that  
336 these behaviors are not altered by the presence of a surface. Below we discuss the molecular, biophysical,  
337 and physiological implications of these findings.

338 The model we propose here is minimal in its nature and relies only on the presence of extension and  
339 retraction motors and their stochastic interactions with the pilus machine. We suggest that cells can tune  
340 the binding and unbinding rates that we present here to alter pilus dynamics. An interesting conclusion  
341 from our results is that the major throttle of pilus extension is the low unbinding rate of the retraction  
342 motor. In *Myxococcus xanthus*, only one pole is piliated leading to directed twitching motility. In  
343 agreement with our model, retraction motors localize predominately to the lagging pole that does not  
344 make TFP while extension motors localize to the piliated leading pole<sup>30</sup>. In contrast, our finding that the  
345 retraction motors likely remain bound to the pilus machines well after pilus retraction is complete does  
346 not agree with the interpretation of a cryo-EM study of *M. xanthus* in which the retraction motor's  
347 electron density was not seen bound to unpiliated machines<sup>12</sup>. This discrepancy could be due to an  
348 artifact introduced during the interpretation of the cryo EM pictures or during sample preparation.  
349 Another possibility is that TFP dynamics differ across species. Future structural studies in *P. aeruginosa*  
350 and TFP dynamics measurements in *M. xanthus* should help understand these differences.

351 While our results indicate that TFP dynamics can be understood as a simple competitive binding  
352 system, this system can still be regulated by accessory factors that alter the base rates of binding,  
353 unbinding, extension, and retraction. For example, in *M. xanthus*, the direction of twitching motility and  
354 the TFP localization pattern oscillates periodically and this process is orchestrated by the frz system,  
355 suggesting that frz regulates both motors either directly or indirectly<sup>31</sup>. Similarly, in *P. aeruginosa*, the  
356 Pil-Chp two-component system regulates pilus behaviors, both through biochemical interaction of the two  
357 response regulators PilG and PilH with the pilus machine and by transcriptional modification using the

358 cAMP dependent transcriptional regulator Vfr<sup>32-34</sup>. The second messenger c-di-GMP has also been shown  
359 to interact directly with the extension motor and other components of the TFP machine<sup>35-37</sup>, thus  
360 resembling another interesting candidate for the regulation of the binding and unbind rates of TFP.

361 Previous studies have invoked complicated molecular force sensors and fast coordination  
362 between motor elements. However, our findings indicate that such elaborations are not necessary to  
363 explain basic pilus behaviors. Nevertheless, our results do not exclude the possibility that surface contact  
364 is sensed actively by pilus retraction leading to subsequent biochemical signaling that changes protein  
365 synthesis or transcription<sup>5,25,32</sup>. While the presence of a surface does not alter TFP dynamics directly,  
366 surface sensing could still be mediated by TFP through biochemical changes in the pilus machine that do  
367 not affect the binding or unbinding rates but are sensed by auxiliary modules like PilJ.

368 We also note that our model abstracts the extension and retraction motors. In *P. aeruginosa*, PilB  
369 is the only known extension motor, PilT is considered the primary retraction motor, and PilU has been  
370 shown to affect retraction<sup>22,38</sup>. Our analysis confirms that PilU is indeed not needed for retraction but  
371 does affect retraction speed (Supplementary Figure 6). Recent studies also suggest that these motors may  
372 have more complicated interactions<sup>38,39</sup>, and in the future our model could help tease apart the specific  
373 contributions of different mutants to the extension and retraction cycle.

374 Our findings show that while most *P. aeruginosa* make many pili, these cells have tuned the  
375 affinities and rates of the extension and retraction motors to generate short pili that are rapidly and fully  
376 retracted. However, this also prevents individual pilus machines from rapidly extending new pili after a  
377 retraction event, such that frequent pilus extension requires the presence of multiple pilus machines. We  
378 suggest that tuning the pilus parameters to increase retraction events benefits *P. aeruginosa* by enhancing  
379 surface interactions such as the displacement required for twitching motility. Frequent pilus retraction  
380 also allows planktonic cells to efficiently sample the environment for the presence of a surface. Once a  
381 pilus is bound and retracts under load, subsequent downstream signaling activates transcriptional  
382 programs associated with a surface bound lifestyle<sup>5,11,25,32,40</sup>. Similarly, tuning the parameters to ensure  
383 that most pili are fully retracted enhances pilus subunit recycling to the membrane, thereby enhancing the  
384 rate of new pilus production. Thus, our findings support the hypothesis that *P. aeruginosa* has evolved to  
385 maximize its pilus budget for interaction with surfaces. In the future it will be interesting to see how  
386 regulatory elements such as the Pil-Chp two-component system or second messenger mediated  
387 modifications can alter the base rates described here<sup>32,35-37</sup>. Further, it is likely that other species with  
388 other physiological demands and constraints modulate the kinetics of motor binding to change pilus  
389 length, number, and dynamics to achieve other functions, like cell-cell interactions or DNA uptake.

## 390 **Methods**

391 **Strains, plasmids, growth conditions, and cloning.** The bacterial strains, plasmids, and primers used in  
392 this study are described in Supplementary Tables 1 – 3.

393 *P. aeruginosa* PAO1 was grown in liquid LB Miller (Difco) and Cysteine free EZ rich defined  
394 medium (Teknova)<sup>41</sup> in a floor shaker, on LB Miller agar (1.5 % Bacto Agar), on Vogel-Bonner minimal  
395 medium agar (VBMM, 200 mg/l MgSO<sub>4</sub> 7H<sub>2</sub>O, 2 g/l citric acid, 10 g/l K<sub>2</sub>HPO<sub>4</sub>, 3.5 g/l NaNH<sub>4</sub>HPO<sub>4</sub> 4  
396 H<sub>2</sub>O, 1.5 % agar), and on no salt LB agar (NSLB, 10 g/l tryptone, 5 g/l yeast extract, 1.5 % agar) at 30 °C  
397 (for cloning, see below) or at 37 °C. *E. Coli* S17 was grown in liquid LB Miller (Difco) in a floor shaker  
398 and on LB Miller agar (1.5 % Bacto Agar) at 30 °C (for cloning, see below) or at 37 °C. Antibiotics were  
399 used at the following concentrations: 200 µg/ml carbenicillin in liquid (300 µg/ml on plates) or 10 µg/ml  
400 gentamycin in liquid (30 µg/ml on plates) or 10 µg/ml anhydrotetracycline in liquid for Pseudomonas and  
401 100 µg/ml carbenicillin in liquid (100 µg/ml on plates) or 30 µg/ml gentamycin in liquid (30 µg/ml on  
402 plates) for *E. Coli*.

403 The *ΔfliC* deletion and PilA-Cysteine knock-in strains were generated using two-step allelic  
404 exchange<sup>42</sup>. Briefly, the *ΔfliC* cloning vector was created by digesting the pEXG2 backbone with the  
405 HindIII HF restriction enzyme (NEB). 500 bp of the flanking regions up- and downstream of *fliC* were  
406 PCR amplified using primer pairs DfliC\_P1/2 and DfliC\_P3/4. Both products were then joined using  
407 sewing PCR with primers DfliC1/4 and subsequently digested with HindIII HF. The product was then  
408 ligated into the pEXG2 backbone using T4 DNA ligase (NEB). The PilA-Cysteine knock-in vectors were  
409 created similarly by amplifying the 500 bp flanking regions up- and downstream of the mutation site using  
410 primers pilA-XYYC, where XYY stands for the name and location of the original residue. The  
411 overlapping primers were chosen as reverse complement containing the point mutation. After ligation, the  
412 cloning vectors were electroporated into *E. Coli* and the correct mutation was confirmed using PCR and  
413 sanger sequencing with primers pEXG2\_Ver1/2. For mating, 1.5 ml *E. coli* containing the vector were  
414 grown to OD 0.5. The *P. aeruginosa* parental strain was grown overnight, and 0.5 ml culture was diluted  
415 1:2 into fresh LB and incubated for 3 hours at 42 °C. Both cultures were concentrated into 100 µl and  
416 spotted onto an LB agar plate and incubated overnight at 30 °C. The puddle was scrapped off,  
417 resuspended into 150 µl PBS, spread onto a VBMM plate containing 30 µg/ml gentamycin and incubated  
418 24 hours at 37 °C. Six single colonies from the VBMM plate were struck onto NSLB and incubated for  
419 24 hours at 30 °C. Several single colonies from the NSLB plate were screened for the correct mutation  
420 using PCR amplification with the flanking primers and sanger sequencing.



421           The chromosomal tetracycline (tet) inducible *pilT*-H222A mutant was constructed in two steps:  
422 first, the plasmid pMK47 containing an inducible mKate2 construct was constructed by digesting the  
423 pUC18-mini-Tn7T-LAC vector with NsiI and Eco53kI restriction enzymes (NEB) <sup>43</sup>. A tet regulation  
424 cassette was PCR amplified from plasmid pXB300 <sup>44</sup> using primers pMK47\_F1.For and pMK47\_F1.Rev  
425 and the gene coding for the fluorescent protein mKate2 was amplified from plasmid pPaQa <sup>5</sup> using  
426 primers pMK47\_F2.For and pMK47\_F2.Rev. All three fragments were joined using Gibson assembly.  
427 Next, plasmid pMK73 was made by PCR amplifying the backbone of plasmid pMK47 containing the tet  
428 inducible construct using primers pMK47BB.For and pMK47BB.Rev. The PilT-H222A fragment was  
429 generated by a two-step PCR amplification: first, the regions up- downstream of the mutated residue were  
430 amplified using primer pairs pMK73F1.For / PilT\_H222A\_P2 and PilT\_H222A\_P3 / pMK73\_Flag,  
431 introducing an additional Flag tag at the C-terminus of PilT. The overlapping primers were designed as  
432 reverse complements containing the point mutation. Then, both fragments were joined using sewing PCR  
433 with primers pMK73F1.For and pMK73F1.Rev. This fragment and the backbone were then joined using  
434 Gibson assembly. Plasmid pMK47 and pMK73 were inserted into the chromosome of PAO1 by co-  
435 electroporation with plasmid pTNS2 <sup>43</sup>. In brief, 10 ml of the parental strain was grown to late log phase  
436 (OD 1.0), washed three times and then resuspended in 60  $\mu$ l 300 mM sucrose together with 600 ng of  
437 pTNS2 and 600 ng of either pMK47 or pMK73. After electroporation, strains were recovered in 1 ml LB  
438 for 2 hours at 37 C shaking and the entire reaction was plated onto LB agar containing 30  $\mu$ m/ml  
439 gentamycin. Single colonies were verified using sanger sequencing.

440 **Sample preparation and imaging.** For imaging of pilus dynamics, cells were grown overnight in EZ  
441 rich medium at 37 °C, diluted 1:1000 into fresh EZ rich and grown to mid log phase (OD 0.4). EZ rich  
442 medium has a low background fluorescence and the absence of free Cysteine improves the labeling  
443 efficiency with the maleimide dye while assuring rich growth conditions. 1 mg of Alexa488 maleimide  
444 (Fisher A10254) was suspended in 400  $\mu$ l DMSO, aliquoted and stored at -20 °C. Freeze-thaw cycles  
445 were avoided as they degrade efficiency of pilus labeling. Dye was added 1:100 to 180  $\mu$ l of culture and  
446 incubated for 45 minutes at 37 °C in the dark. Cells were washed twice gently in EZ rich by pelleting at 6  
447 krpm for 30 seconds in a conventional tabletop centrifuge and concentrated to 20  $\mu$ l. For optical trapping  
448 experiments in liquid, a tunnel slide was made by placing a regular cover slip on a microscope slide,  
449 separated by double sided sticky tape at each side of the cover slip. Cell were flushed in by capillary  
450 forces using a pipette and ends were sealed with Valap to prevent evaporation and flow of liquid. WT  
451 cells have flagella and typically swim out of the optical trap. To prevent cells from leaving the trap, we  
452 used a flagella knockout  $\Delta$ *fliC* for all quantitative experiment after confirming qualitatively that  
453 flagellated WT cells still make and retract pili when trapped. For all other experiments, 0.5 % agarose

454 pads were made by melting 1.0 % agarose in water. Agarose was cooled down to 60 °C and mixed 50:50  
455 with double concentrated EZ rich at 60 °C. 1 ml of labeled cell culture was spotted on each pad and the  
456 pad was transferred to a no 1.5 glass bottom petri dish (Mattek). All experiments were performed at 37 °C  
457 on three different microscopes as described in the following.

458 HILO. Highly inclined thin illumination microscopy (HILO) is a variation of total internal  
459 reflection microscopy (TIRF)<sup>45</sup>. Similar to TIRF, HILO has a significantly improved signal to  
460 background ratio compared to epifluorescence but maintains the axial penetration depth of  
461 epifluorescence, thus enabling to observe processes away from the coverslip surface at much reduced  
462 bleaching and improved image quality. We used a commercial Nikon Ti-E microscope equipped with a  
463 TIRF module and set the direction of the incident laser slightly below the critical TIRF angle. The  
464 microscope was used with perfect focus, a 100x NA 1.49 Apo TIRF lens (Nikon), an EMCCD camera  
465 (iXon Ultra DU-897U, Andor), a stage top incubator (INU, Tokai Hit) and controlled by Nikon Elements  
466 software.

467 R-HILO and optical trapping. The combined optical trapping (OT) and ring-HILO (R-HILO)  
468 setup was custom built on a TE2000 body (Nikon). Similar to ring-TIRF<sup>46</sup>, ring-HILO improves the  
469 spatial homogeneity of the image by reducing the spatial coherence of the illumination. To our  
470 knowledge, this is the first time that HILO has been used in a scanning configuration. Briefly, a 5 W 1064  
471 nm laser (Spectra Physics) was focused in the focal plane using a 100x NA 1.49 Apo TIRF lens (Nikon)  
472 to create an optical trapping potential<sup>47</sup>. To form the line optical trap<sup>28,48</sup>, the laser focus was scanned at  
473 200 Hz over a distance of 5 µm in the focal plane of the objective lens using a tip-tilt piezo mirror (Mad  
474 City Labs) and a function generator (GFG-8215A, Instek). The laser power was set as low as possible to  
475 avoid photodamage of the trapped cell. Samples were positioned using a three-axis piezo stage (Mad City  
476 Labs). For R-HILO, a Coherent Obis 488 nm LS 60 mW laser was focused in the back focal plane of the  
477 objective lens and scanned on a ring in the back focal plane using a two-axis galvanometric scanner  
478 (GVS212, Thorlabs) positioned in a conjugate plane. The radius of the focus with respect to the optical  
479 axis and the scanning frequency were set using a NI PCIe-6251 digital to analog DAQ card (National  
480 Instruments). Fluorescence excitation, emission, and the optical trapping light were combined using a  
481 quad-band dichroic mirror (Di01-R405/488/561-25x36, Semrock), quad-band emission filter (FF01-  
482 446/523/600/677-25, Semrock), and a short pass filter (FESH0750, Thorlabs). Images were acquired  
483 using a water cooled EMCCD camera (iXon Ultra DU-897, Andor). The entire microscope was controlled  
484 using custom written software in National Instruments LabView. Cells were incubated using a custom  
485 built, laser-cut incubation chamber and a PID temperature controller (In Vivo Scientific).

486 SIM. We used a Nikon Ti-E N-SIM microscope equipped with perfect focus, a 100x NA 1.49  
487 Apo TIRF lens (Nikon), an EMCCD camera (iXon 3 DU-897E, Andor), a stage top incubator (INU,  
488 Tokai Hit) and controlled by Nikon Elements software for structured illumination microscopy (SIM)<sup>49</sup>.  
489 Nine images in 2D mode were acquired for every super-resolved image to ensure a high effective frame  
490 rate (1 Hz).

491 **Image analysis and pilus tracking.** Images were analyzed in Fiji. Briefly, stacks of individual cells were  
492 cropped, interpolated 10x to improve further image processing (see below), and photobleaching was  
493 removed using the bleach correction tool. A line ROI was drawn along the pilus extending the maximum  
494 length of the pilus by at least 1  $\mu\text{m}$ , and the intensity along the ROI was measured for every image of the  
495 stack using a macro<sup>50</sup>. These data were then copy and pasted into another software (Wavemetrics Igor  
496 Pro) for subsequent processing with custom written scripts. The length of the pilus was detected in every  
497 frame using thresholding of the intensity. The resulting kymographs and pilus length trajectories are  
498 shown in Supplementary Figure 2. The extension, dwell, and retraction times, pilus length, extension and  
499 retraction velocities were extracted from these trajectories semi-automated by identifying start and stop of  
500 each extension and retraction by hand.

501 **Statistical analysis.** The number of independent replicates and analyzed samples used in each figure is  
502 shown in Supplementary Table 4. As shown in Supplementary Table 4, the parameters of the model were  
503 estimated based on data (Fig. 2) that were independent of the data shown in the rest of the paper (Figs.  
504 1,3,4). For analysis of the rate of pilus production per cell, single isolated cells were selected to ensure  
505 that no pilus is obstructed by a nearby cell. Otherwise there was no special selection. To increase  
506 statistical significance of the analyzed data, we used bootstrapping. In brief, for a set of analyzed data  
507 (e.g. pilus length) with  $N$  datapoints, we randomly picked  $N$  datapoints with replacement and analyzed  
508 this randomly picked dataset, e.g., by calculating the histogram. This process was repeated 10,000 times  
509 and statistical quantities of this bootstrapped data were calculated, e.g., the mean of all histograms and its  
510 95 % confidence interval. Unless stated otherwise, P-values of two independent measurements were  
511 calculated using a two-tailed Wilcoxon-Mann-Whitney rank test in respect of the exponential shape of  
512 most distributions.

513 **Model description and estimation of rate constants.** We propose a minimal 3-state model where the  
514 basal body of the motor can switch between three states: unbound, bound to the extension motor, and  
515 bound to the retraction motor. Both motors bind to the empty base in a mutually exclusive manner, with a  
516 binding rate of  $k_{ext,on}$  and  $k_{ret,on}$ , respectively. Binding of the extension motor leads to pilus extension and  
517 binding of the retraction motor leads to pilus retraction when a pilus is present. Both motors associated  
518 with the base unbind with rates  $k_{ext,off}$  and  $k_{ret,off}$ , respectively. A key assumption of our model is that all

519 rates are independent of the piliation state. Thus, the retraction motor could bind to the base in a non-  
 520 piliated state, in which case, it blocks the extension motor from binding. Binding or unbinding of a  
 521 protein to a substrate are described by a Poisson process. In brief, the probability  $Q(t)$  that the  
 522 binding/unbinding process of rate  $k$  does not occur until the time  $t$  has passed is described by the  
 523 differential equation  $Q(t+dt) = (1 - k dt) Q(t)$  with the initial condition  $Q(t = 0) = 1$ , which yields the  
 524 exponential decay  $Q(t) = \exp(-kt)$ . Therefore, the probability density to observe a binding/unbinding event  
 525 at time  $t$ , is given by  $P(t) = kQ(t) = k \exp(-kt)$ . If the experimental time resolution  $t^*$  is finite, events  
 526 shorter than  $t^*$  are missed which results in the shifted distribution  $\tilde{P}(t) = P(t) / P^*(t^*) = k \exp(-k(t - t^*))$   
 527 for  $t > t^*$ , where  $P^*(t^*) = \int_{t^*}^{\infty} P(t) dt$ . Due to our sampling rate of 20 Hz which is fast compared to the  
 528 dynamics of the pilus, this shift is negligible except for the detection of multiple extension or retraction  
 529 events (Supplementary Figure 2).

530 Binding rates of the motors. The binding rates of both proteins defines the dwell time between  
 531 extension stalls and the subsequent extension or retraction starts. To calculate  $k_{ext,on}$  and  $k_{ret,on}$ , we looked  
 532 into all identifiable pauses (extension-extension, extension-retraction, retraction-retraction) and their  
 533 dwell times. In our model, those pauses correspond to an unbound state of the base. The probability that  
 534 an extension/retraction motor binds at time  $t$  after the pause begins is given by  $P_{ext/ret}(t) = k_{ext/ret,on} \exp(-k_{on}$   
 535  $t)$ , where  $k_{on} = k_{ext,on} + k_{ret,on}$ . The frequency of observing extension-extension events is thus given by  $f =$   
 536  $\int_0^{\infty} P_{ext}(t) dt = k_{ext,on} / k_{on}$ . Due to limited resolution, we can only observe extension-extension events  
 537 with an intervening dwell time  $t > t^* = 0.25$  s. To include this limitation in our analysis, we estimate the  
 538 ratio of observed extension-extension to extension-retraction events to be

$$539 \quad f^* = \int_{t^*}^{\infty} P_{ext}(t) dt / \int_0^{\infty} P_{ret}(t) dt = \left( \frac{k_{ext,on}}{k_{on}} \exp(-k_{on} t^*) \right) / \left( \frac{k_{ret,on}}{k_{on}} \right). \text{ Experimentally, we obtain } k_{on}^{-1} = 0.35_{-0.05}^{+0.25} \text{ s and } f^* \\ 540 = 15 / 181 = 0.083, \text{ and consequently } k_{ext,on}^{-1} = 2.4_{-0.3}^{+1.8} \text{ s and } k_{ret,on}^{-1} = 0.4_{-0.05}^{+0.30} \text{ s.}$$

541 Unbinding rate of the extension motor. In order to obtain  $k_{ext,off}$ , we looked at the duration  $T_{ext}$  of  
 542 all pilus extension events. The model predicts that the probability of observing an extension event lasting  
 543 for  $t = T_{ext}$  follows an exponential distribution  $P(t) = k_{ext,off} \exp(-k_{ext,off} t)$  (Fig. 2b). By fitting the  
 544 exponential distribution to our experimental data, we obtained  $k_{ext,off}^{-1} = 1.6_{-0.2}^{+0.5}$  s. We further tested the  
 545 hypothesis that the data are drawn from an exponential distribution using a one-sample Kolmogorov-  
 546 Smirnov (K-S) test, which yields  $P = 0.87$  indicating that the data are not significantly different from an  
 547 exponential distribution, as expected.

548 Unbinding rate of the retraction motor. To obtain a meaningful estimation of  $k_{ret,off}$ , we took into  
 549 account the entire data set of both partial and full retraction events, and computed the maximum

550 likelihood estimate of  $k_{ret,off}$  that maximizes the likelihood of observing all the events. The probability that  
 551 the retraction motor stays attached to the base after a pilus becomes fully retracted in time  $t_{full}$  is  $P_{full}(t_{full})$   
 552  $= \exp(-k_{ret,off} t_{full})$ . The probability to observe a partial retraction where the retraction motor unbinds within  
 553 a time window  $t_{part} - \Delta t$  to  $t_{part}$  is given by  $P_{part}(t_{part}) = \exp(-k_{ret,off} (t_{part} - \Delta t)) - \exp(-k_{ret,off} t_{part})$ , where  $\Delta t =$   
 554 0.1 s is the finite time resolution of the experiment. The likelihood  $L$  of observing the partial and full  
 555 retraction events  $\{t_{full}^i, t_{part}^j\}$  presented here as a function of  $k_{ret,off}$  is then given by

$$556 \quad L(k_{ret,off}, \{t_{full}^i, t_{part}^j\}) = const. \prod_i P_{full}(t_{full}^i) \prod_j P_{part}(t_{part}^j) \cdot L(k_{ret,off}; \{t_{full}^i, t_{part}^j\}) = const. \prod_i P_{full}(t_{full}^i) \prod_j P_{part}(t_{part}^j) \cdot A_s$$

557 shown in Supplementary Figure 3, we varied  $k_{ret,off}$  and found the maximum of the likelihood function at  
 558  $k_{ret,off}^{-1} = 9.1_{-3.8}^{+9.7}$  s. Errors represent the  $e^{-1}$  drop of the maximum likelihood.

559 **Monte Carlo simulation (MCS) of the dynamic binding of the motor proteins.** To simulate the  
 560 dynamic binding and unbinding of both proteins, we used the Gillespie algorithm<sup>51</sup>. In brief, the  
 561 algorithm tracks the three variables: time  $t$ , pilus state  $S$ , and pilus length  $L$ . The states with the extension  
 562 motor bound, the retraction motor bound, and empty base are denoted, respectively, by  $S = E$ ,  $S = R$ ,  $S =$   
 563  $\phi$ . The algorithm updates the variables as follows:

$$564 \quad t^{(n+1)} = t^{(n)} + \begin{cases} T_{ext} & \text{if } S^{(n)} = E \\ T_{ret} & \text{if } S^{(n)} = R, \\ T_{on} & \text{if } S^{(n)} = \phi \end{cases}$$

565 where  $T_{ext}$ ,  $T_{ret}$ , and  $T_{on}$  are randomly chosen from the exponential distributions defined by  $k_{ext,off}$ ,  $k_{ret,off}$ ,  
 566  $k_{on}$ ;

$$567 \quad S^{(n+1)} = \begin{cases} \phi & \text{if } S^{(n)} = E \text{ or } R \\ E & \text{if } S^{(n)} = \phi \text{ and } x \in \left[0, \frac{k_{ext,on}}{k_{on}}\right), \\ R & \text{if } S^{(n)} = \phi \text{ and } x \in \left[\frac{k_{ext,on}}{k_{on}}, 1\right] \end{cases}$$

568 where  $x$  is a random number drawn from a uniform distribution on the interval  $[0, 1]$ , and

$$569 \quad L^{(n+1)} = \begin{cases} L^{(n)} + v_{ext} T_{ext} & \text{if } S^{(n)} = E \\ \max(0, L^{(n)} - v_{ret} T_{ret}) & \text{if } S^{(n)} = R, \\ L^{(n)} & \text{if } S^{(n)} = \phi \end{cases}$$

570 where for each step, the extension/retraction speed  $v_{ext} = 485 \pm 170$  nm/s and  $v_{ret} = 750 \pm 314$  nm/s are  
 571 randomly chosen from a normal distribution with mean  $\pm$  standard deviation as described in the main text.  
 572 We then simulated  $10^4$  100-minute long trajectories of the stochastic model with the rate parameters

573 taking the mean, lower bound, or upper bound values of the experimental measurements. From these  
574 simulated data, we first calculated if retraction resulted in a partial or full retraction event. Then, we  
575 calculate the distributions and their 95 % confidence intervals for all quantities and added them to the  
576 corresponding figures (Fig. 1e for pilus length, Fig. 2b for extension time, and Figs. 2d and 3b for  
577 retraction time). For each simulated trajectory, we then randomly cut out a one-minute long trajectory and  
578 counted the number of pili made in that one minute time window (see Fig. 3e).

579 To test whether the experimentally obtained distribution of pilus production rate is consistent  
580 with the simulated distributions of the three model, we performed a Kolmogorov-Smirnov test.  
581 Corresponding to the experimental data size, we computed the production rate for 10000 sets of 111 pilus  
582 machines in simulations and calculated the distribution of the distance  $D$  between the cumulative  
583 distribution of each individual simulation to the average of all simulations. We then measured the distance  
584  $D_{\text{exp}}$  of the experimental distribution of pilus production rates to the same average of the simulation. This  
585 allowed us to obtain a measure of the statistical significance of our experimental data. Specifically, we  
586 defined the P-value as the probability of  $D > D_{\text{exp}}$ . Here, the null hypothesis is that the experimental data  
587 is generated by the particular model. Consequently and opposite to a standard T-test, a large P-value ( $P >$   
588  $0.05$ ) means the null hypothesis cannot be rejected and hence is a good fit between the data and the  
589 simulation while a small P-value ( $P < 0.01$ ) indicates that the simulation is unlikely to reproduce the  
590 experimental data. To include the uncertainty of the experimental measurements of binding and unbinding  
591 rates, we calculated P-values for each model using the mean of the estimated rates, the lower bounds and  
592 the upper bounds. For Model 1, we obtained  $P < 1e-6$ ,  $P = 0.02$ ,  $P = 0.40$  for the lower bound, the mean,  
593 and the upper bound of the rates respectively. For Model 2 and 3 we obtained  $P < 1e-6$  for all  
594 combinations of rates. For the ease of reading, we converted these P-values to regular P-values in the  
595 main manuscript, i.e.,  $P < 1e-3$  and  $P > 0.05$  of the Kolmogorov-Smirnov test are converted to  $P > 0.05$   
596 and  $P < 0.001$ , respectively, in the main manuscript text.

597

## 598 References

- 599 1 Denise, R., Abby, S. S. & Rocha, E. P. Diversification of the type IV filament superfamily into  
600 machines for adhesion, protein secretion, DNA uptake, and motility. *PLoS biology* **17**, e3000390  
601 (2019).
- 602 2 Burrows, L. L. *Pseudomonas aeruginosa* twitching motility: type IV pili in action. *Annual review*  
603 *of microbiology* **66**, 493-520 (2012).
- 604 3 Craig, L., Forest, K. T. & Maier, B. Type IV pili: dynamics, biophysics and functional  
605 consequences. *Nature Reviews Microbiology*, 1 (2019).
- 606 4 Merz, A. J., So, M. & Sheetz, M. P. Pilus retraction powers bacterial twitching motility. *Nature*  
607 **407**, 98-102 (2000).
- 608 5 Persat, A., Inclan, Y. F., Engel, J. N., Stone, H. A. & Gitai, Z. Type IV pili mechanochemically  
609 regulate virulence factors in *Pseudomonas aeruginosa*. *Proceedings of the National Academy of*  
610 *Sciences* **112**, 7563-7568 (2015).
- 611 6 Siryaporn, A., Kuchma, S. L., O'Toole, G. A. & Gitai, Z. Surface attachment induces  
612 *Pseudomonas aeruginosa* virulence. *Proceedings of the National Academy of Sciences* **111**,  
613 16860-16865 (2014).
- 614 7 Klausen, M. *et al.* Biofilm formation by *Pseudomonas aeruginosa* wild type, flagella and type IV  
615 pili mutants. *Molecular Microbiology* **48**, 1511-1524 (2003).
- 616 8 O'Toole, G. A. & Kolter, R. Flagellar and twitching motility are necessary for *Pseudomonas*  
617 *aeruginosa* biofilm development. *Molecular Microbiology* **30**, 295-304 (1998).
- 618 9 Craig, L., Pique, M. E. & Tainer, J. A. Type IV pilus structure and bacterial pathogenicity. *Nature*  
619 *Reviews Microbiology* **2**, 363 (2004).
- 620 10 Woods, D., Straus, D., Johanson, W., Berry, V. & Bass, J. Role of pili in adherence of  
621 *Pseudomonas aeruginosa* to mammalian buccal epithelial cells. *Infection and immunity* **29**, 1146-  
622 1151 (1980).
- 623 11 Luo, Y. *et al.* A hierarchical cascade of second messengers regulates *Pseudomonas aeruginosa*  
624 surface behaviors. *MBio* **6**, e02456-02414 (2015).
- 625 12 Chang, Y.-W. *et al.* Architecture of the type IVa pilus machine. *Science* **351**, aad2001 (2016).
- 626 13 Whitchurch, C. B. & Mattick, J. S. Characterization of a gene, pilU, required for twitching  
627 motility but not phage sensitivity in *Pseudomonas aeruginosa*. *Molecular Microbiology* **13**, 1079-  
628 1091 (1994).
- 629 14 Craig, L. *et al.* Type IV pilin structure and assembly: X-ray and EM analyses of *Vibrio cholerae*  
630 toxin-coregulated pilus and *Pseudomonas aeruginosa* PAK pilin. *Molecular cell* **11**, 1139-1150  
631 (2003).
- 632 15 Cowles, K. N. & Gitai, Z. Surface association and the MreB cytoskeleton regulate pilus  
633 production, localization and function in *Pseudomonas aeruginosa*. *Molecular Microbiology* **76**,  
634 1411-1426 (2010).
- 635 16 Maier, B., Koomey, M. & Sheetz, M. P. A force-dependent switch reverses type IV pilus  
636 retraction. *Proceedings of the National Academy of Sciences of the United States of America* **101**,  
637 10961-10966 (2004).
- 638 17 Maier, B., Potter, L., So, M., Seifert, H. S. & Sheetz, M. P. Single pilus motor forces exceed 100  
639 pN. *Proceedings of the National Academy of Sciences* **99**, 16012-16017 (2002).
- 640 18 Biais, N., Higashi, D. L., Brujić, J., So, M. & Sheetz, M. P. Force-dependent polymorphism in  
641 type IV pili reveals hidden epitopes. *Proceedings of the National Academy of Sciences* **107**,  
642 11358-11363 (2010).
- 643 19 Biais, N., Ladoux, B., Higashi, D., So, M. & Sheetz, M. Cooperative retraction of bundled type  
644 IV pili enables nanonewton force generation. *PLoS biology* **6**, e87 (2008).
- 645 20 Beaussart, A. *et al.* Nanoscale adhesion forces of *Pseudomonas aeruginosa* type IV pili. *ACS*  
646 *nano* **8**, 10723-10733 (2014).

- 647 21 Sabass, B., Koch, M. D., Liu, G., Stone, H. A. & Shaevitz, J. W. Force generation by groups of  
648 migrating bacteria. *Proceedings of the National Academy of Sciences*, 201621469 (2017).
- 649 22 Talà, L., Fineberg, A., Kukura, P. & Persat, A. Pseudomonas aeruginosa orchestrates twitching  
650 motility by sequential control of type IV pili movements. *Nature microbiology* **4**, 774 (2019).
- 651 23 Skerker, J. M. & Berg, H. C. Direct observation of extension and retraction of type IV pili.  
652 *Proceedings of the National Academy of Sciences* **98**, 6901-6904 (2001).
- 653 24 Ellison, C. K., Dalia, T. N., Dalia, A. B. & Brun, Y. V. Real-time microscopy and physical  
654 perturbation of bacterial pili using maleimide-conjugated molecules. *Nature protocols* **14**, 1803  
655 (2019).
- 656 25 Ellison, C. K. *et al.* Obstruction of pilus retraction stimulates bacterial surface sensing. *Science*  
657 **358**, 535-538 (2017).
- 658 26 Ellison, C. K. *et al.* Retraction of DNA-bound type IV competence pili initiates DNA uptake  
659 during natural transformation in *Vibrio cholerae*. *Nature microbiology*, 1 (2018).
- 660 27 Laventie, B.-J. *et al.* A surface-induced asymmetric program promotes tissue colonization by  
661 *Pseudomonas aeruginosa*. *Cell host & microbe* **25**, 140-152. e146 (2019).
- 662 28 Koch, M. & Rohrbach, A. Object-adapted optical trapping and shape-tracking of energy-  
663 switching helical bacteria. *Nat. Photonics* **6**, 680-686, doi:10.1038/nphoton.2012.232 (2012).
- 664 29 Chiang, P. *et al.* Functional role of conserved residues in the characteristic secretion NTPase  
665 motifs of the *Pseudomonas aeruginosa* type IV pilus motor proteins PilB, PilT and PilU.  
666 *Microbiology* **154**, 114-126 (2008).
- 667 30 Bulyha, I. *et al.* Regulation of the type IV pili molecular machine by dynamic localization of two  
668 motor proteins. *Molecular Microbiology* **74**, 691-706 (2009).
- 669 31 Mignot, T., Merlie, J. P. & Zusman, D. R. Regulated pole-to-pole oscillations of a bacterial  
670 gliding motility protein. *Science* **310**, 855-857 (2005).
- 671 32 Inclan, Y. F. *et al.* A scaffold protein connects type IV pili with the Chp chemosensory system to  
672 mediate activation of virulence signaling in *Pseudomonas aeruginosa*. *Molecular Microbiology*  
673 **101**, 590-605 (2016).
- 674 33 Fulcher, N. B., Holliday, P. M., Klem, E., Cann, M. J. & Wolfgang, M. C. The *Pseudomonas*  
675 *aeruginosa* Chp chemosensory system regulates intracellular cAMP levels by modulating  
676 adenylate cyclase activity. *Molecular Microbiology* **76**, 889-904 (2010).
- 677 34 Buensuceso, R. N. *et al.* Cyclic AMP-independent control of twitching motility in *Pseudomonas*  
678 *aeruginosa*. *Journal of Bacteriology* **199**, e00188-00117 (2017).
- 679 35 Jain, R., Sliusarenko, O. & Kazmierczak, B. I. Interaction of the cyclic-di-GMP binding protein  
680 FimX and the Type 4 pilus assembly ATPase promotes pilus assembly. *PLoS pathogens* **13**,  
681 e1006594 (2017).
- 682 36 Roelofs, K. G. *et al.* Systematic identification of cyclic-di-GMP binding proteins in *Vibrio*  
683 *cholerae* reveals a novel class of cyclic-di-GMP-binding ATPases associated with type II  
684 secretion systems. *PLoS pathogens* **11** (2015).
- 685 37 Dye, K. J. & Yang, Z. Cyclic-di-GMP and ADP bind to separate domains of PilB as mutual  
686 allosteric effectors. *Biochemical Journal* **477**, 213-226 (2020).
- 687 38 Chlebek, J. L. *et al.* PilT and PilU are homohexameric ATPases that coordinate to retract type  
688 IVa pili. *PLoS Genet* **15**, doi:https://doi.org/10.1371/journal.pgen.1008448 (2019).
- 689 39 Adams, D. W., Pereira, J. M., Stoudmann, C., Stutzmann, S. & Blokesch, M. The type IV pilus  
690 protein PilU functions as a PilT-dependent retraction ATPase. *PLoS genetics* **15**, e1008393  
691 (2019).
- 692 40 Lee, C. K. *et al.* Multigenerational memory and adaptive adhesion in early bacterial biofilm  
693 communities. *Proceedings of the National Academy of Sciences* **115**, 4471-4476 (2018).
- 694 41 Neidhardt, F. C., Bloch, P. L. & Smith, D. F. Culture medium for enterobacteria. *Journal of*  
695 *Bacteriology* **119**, 736-747 (1974).
- 696 42 Hmelo, L. R. *et al.* Precision-engineering the *Pseudomonas aeruginosa* genome with two-step  
697 allelic exchange. *Nature protocols* **10**, 1820 (2015).



698 43 Choi, K.-H. *et al.* A Tn7-based broad-range bacterial cloning and expression system. *Nature*  
699 *Methods* **2**, 443 (2005).  
700 44 Bina, X. R., Wong, E. A., Bina, T. F. & Bina, J. E. Construction of a tetracycline inducible  
701 expression vector and characterization of its use in *Vibrio cholerae*. *Plasmid* **76**, 87-94 (2014).  
702 45 Tokunaga, M., Imamoto, N. & Sakata-Sogawa, K. Highly inclined thin illumination enables clear  
703 single-molecule imaging in cells. *Nature Methods* **5**, 159 (2008).  
704 46 Mattheyses, A. L., Shaw, K. & Axelrod, D. Effective elimination of laser interference fringing in  
705 fluorescence microscopy by spinning azimuthal incidence angle. *Microsc. Res. Tech.* **69**, 642-647  
706 (2006).  
707 47 Koch, M. D. & Shaevitz, J. W. in *Optical Tweezers - Methods and Protocols* Vol. 1486 *Methods*  
708 *Molecular Biology* (ed Arne Gennerich) (Springer, 2016).  
709 48 Koch, M. & Rohrbach, A. How to calibrate an object-adapted optical trap for force sensing and  
710 interferometric shape tracking of asymmetric structures. *Optics Express* **22**, 25242-25257,  
711 doi:10.1364/OE.22.025242 (2014).  
712 49 Gustafsson, M. G. Surpassing the lateral resolution limit by a factor of two using structured  
713 illumination microscopy. *Journal of microscopy* **198**, 82-87 (2000).  
714 50 Schmid, M. <https://imagej.nih.gov/ij/macros/StackProfileData.txt>, 2010).  
715 51 Gillespie, D. T. Exact stochastic simulation of coupled chemical reactions. *The journal of*  
716 *physical chemistry* **81**, 2340-2361 (1977).

717

718

719 **Acknowledgements**

720 We gratefully acknowledge invaluable help, discussions, and comments on the manuscript from  
721 Benjamin Bratton, Geoff Vrla, Joseph Sanfilippo, Nick Martin, Courtney Ellison, Benedikt Sabass, and  
722 support by our lab manager Joseph Sheehan. Additionally, we would like to thank Nicolas Biais and  
723 Jingbo Kan for initial advice on pilus labeling, Sagar Setru for implementing the ring-HiLo imaging at the  
724 optical trap and the patient help by Gary Laevski from the Princeton Molecular Biology Confocal  
725 Microscopy Core Facility and Nikon Center of Excellence

726 This work was supported by grants DP1AI124669 (to Z.G.), R21AI121828 (to J.W.S), and  
727 R01GM082938 (to N.S.W.) from the National Institute of Health, grant PHY-1806501 (to J.W.S.) from  
728 the National Science Foundation, fellowship KO5239/1-1 (to M.D.K.) from the German Research  
729 Foundation DFG, and the Princeton Center for the Physics of Biological Function sponsored by the  
730 National Science Foundation grant PHY-1734030.

731 **Author Contributions**

732 All authors designed the research. M.D.K. performed all experiments. M.D.K. and C.F. analyzed  
733 the data and performed simulations. C.F. and N.S.W. developed the mathematical model. M.D.K., J.W.S.  
734 and Z.G. wrote the paper.

735 **Competing Interests statement**

736 The authors declare no competing financial interest.
